# Supplementary material
Source: PubMed Central journal article supplement (PMC8236240)

Supplementary figures for “Human surface anatomy terminology for dermatology: A Delphi consensus from the International Skin Imaging Collaboration (ISIC)”

Navarrete-Dechent C, et al.

J Eur Acad Dermatol

1. Head and neck

2. Head

3. External ear/ear

4. Pinna

5. Helix of pinna

6. Apex of helix

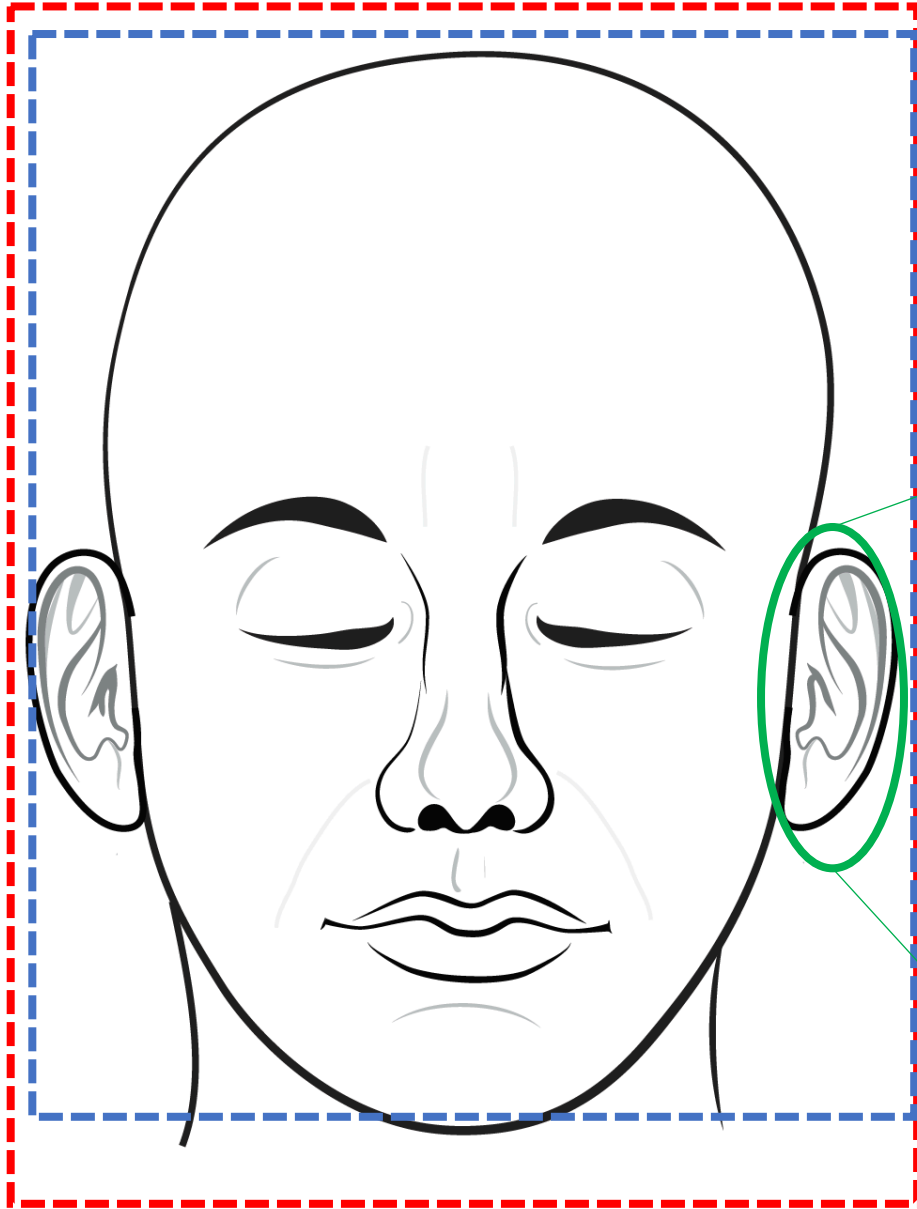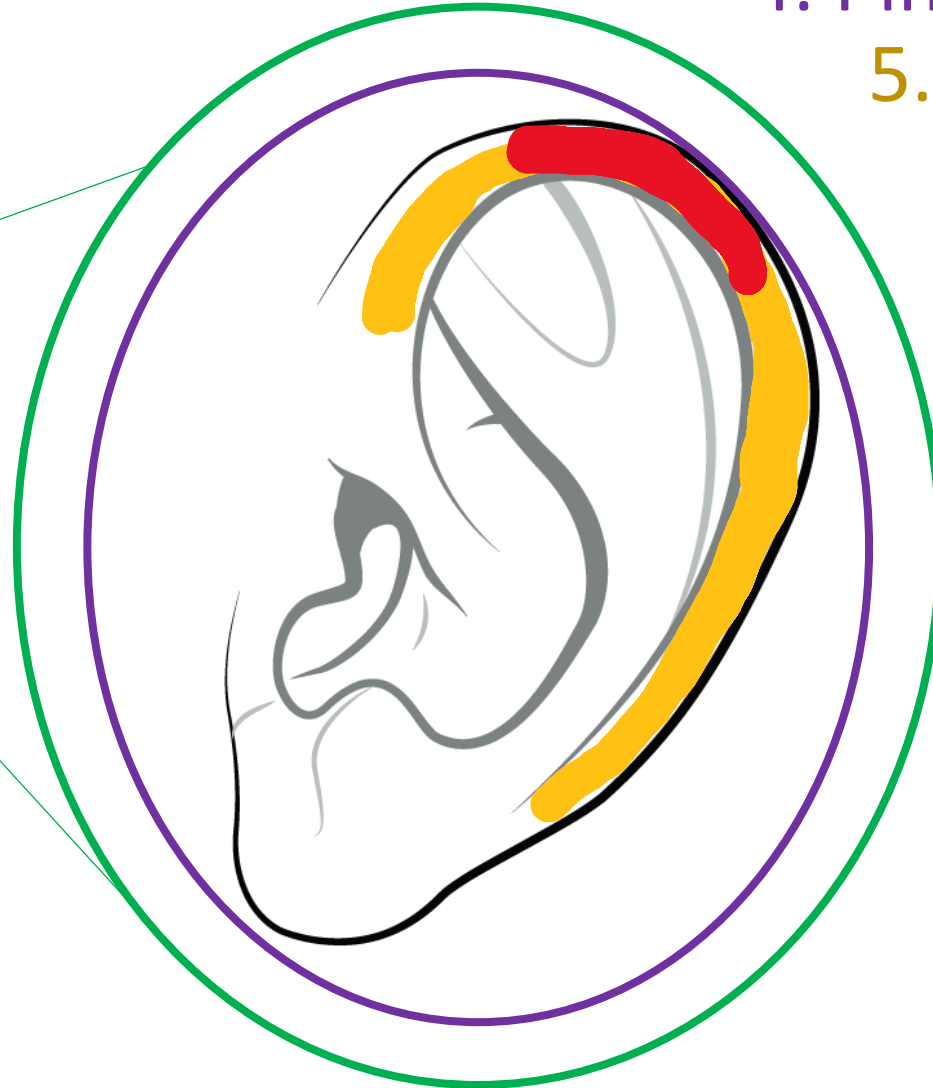

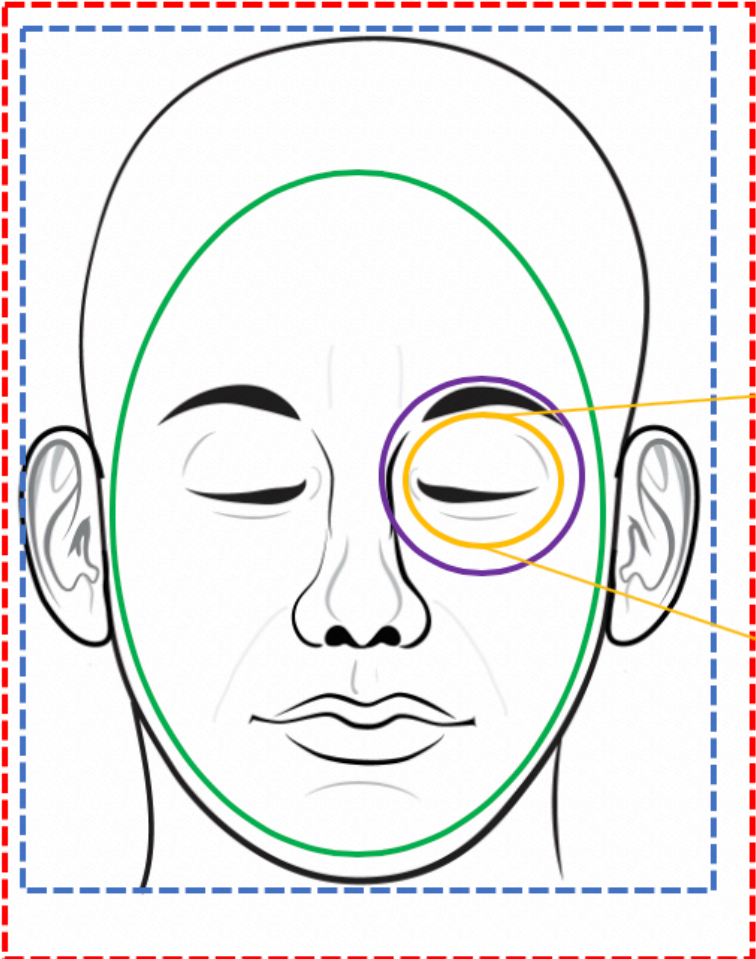

1. Head and neck

2. Head

3. Face

4. Orbital region

5. Eyelid and ocular surface

6. Eyelid

7. Lower eyelid

8. Lower eyelid margin/free edge

9. Inferior lacrimal punctum

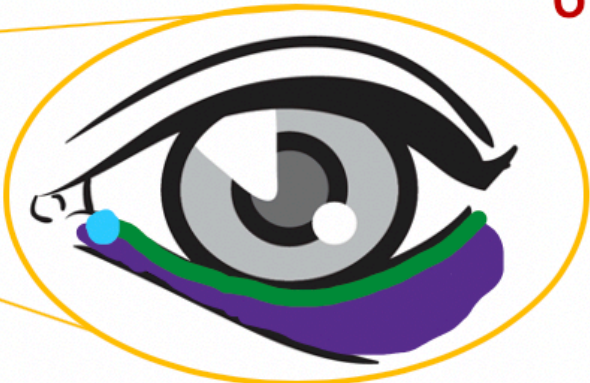

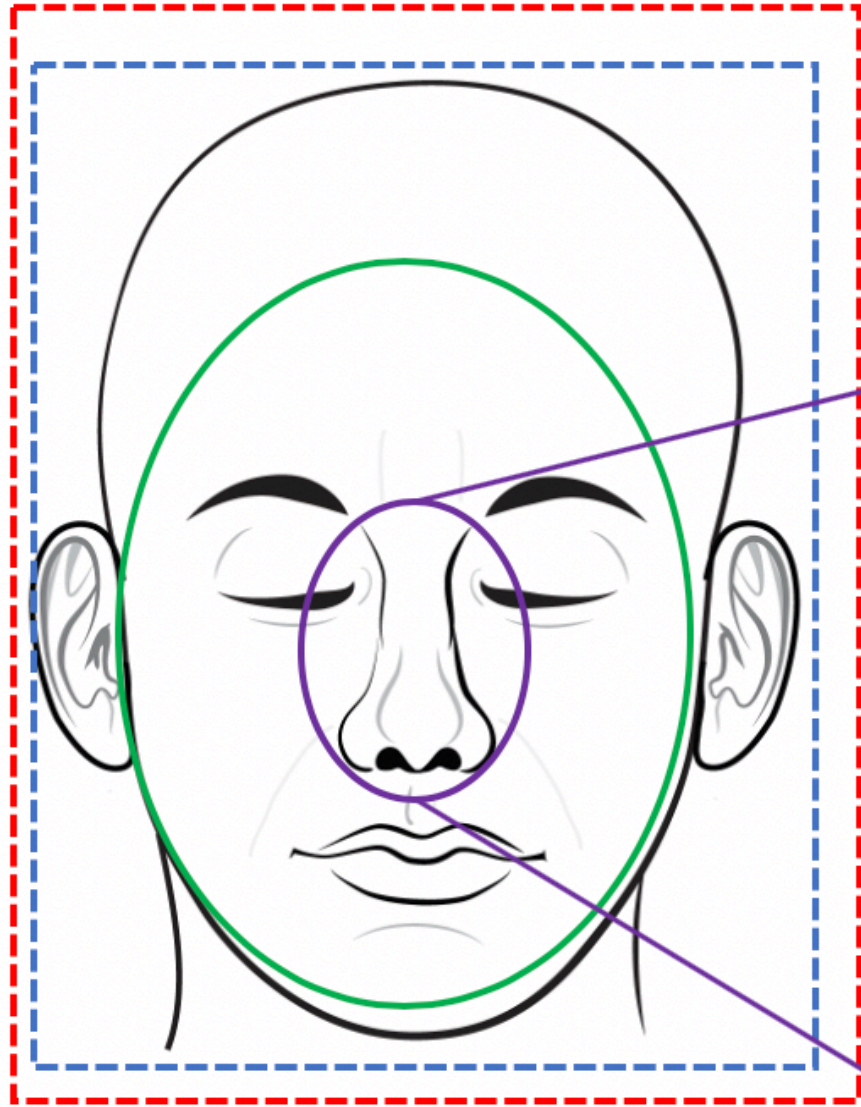

1. Head and neck

2. Head

3. Face

4. Nose

5. Root of nose

5. Dorsum of nose

5. Tip of nose

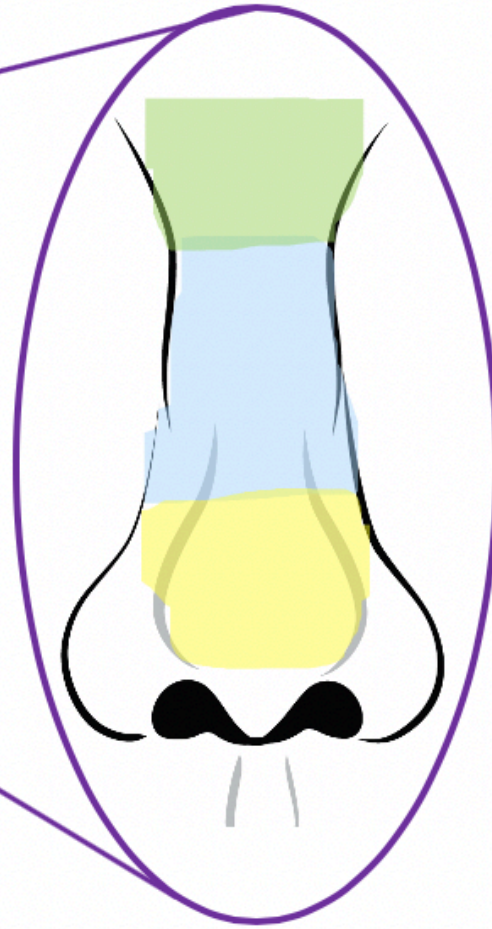

Supplement: NIHMS1716702-supplement-Figures_S1-S3.pdf [file NIHMS1716702-supplement-Figures_S1-S3.pdf]
